# Supplementary material
Source: PubMed Central journal article supplement (PMC6928397)
Supplement: NIHMS1540871-supplement-Supplemental_Figures_I_-_XI.pdf [file NIHMS1540871-supplement-Supplemental_Figures_I_-_XI.pdf]

## SUPPLEMENTAL MATERIALS

### **TLR4-dependent signaling drives extracellular catabolism of low-density lipoprotein aggregates**

Rajesh K. Singh\*<sup>1</sup>, Abigail S. Haka\*<sup>1</sup>, Arky Asmal<sup>1</sup>, Valéria C. Barbosa-Lorenzi<sup>1</sup>, Inna Grosheva<sup>1</sup>, Harvey F. Chin<sup>1</sup>, Yuquan Xiong<sup>2#</sup>, Timothy Hla<sup>2</sup> and Frederick R. Maxfield<sup>1,#</sup>

\*These authors contributed equally to this work

<sup>1</sup>Department of Biochemistry, Weill Cornell Medical College, New York, NY 10065, USA

<sup>2</sup>Vascular Biology Program, Boston Children's Hospital and Department of Surgery, Harvard Medical School, Boston, MA 02115, USA

#Current address: Thoracic Service, Department of Surgery, Memorial Sloan Kettering Cancer Center, New York, NY 10065, USA

**Running title:** TLR4 regulates aggregated LDL catabolism

#To whom correspondence should be addressed: Dr. Frederick R. Maxfield, Department of Biochemistry, Box 63, Weill Cornell Medical College, 1300 York Avenue, New York, NY 10065, USA. E-mail: [frmaxfie@med.cornell.edu](mailto:frmaxfie@med.cornell.edu). Tel: +1 646 962 2759; Fax: 646 962 0519

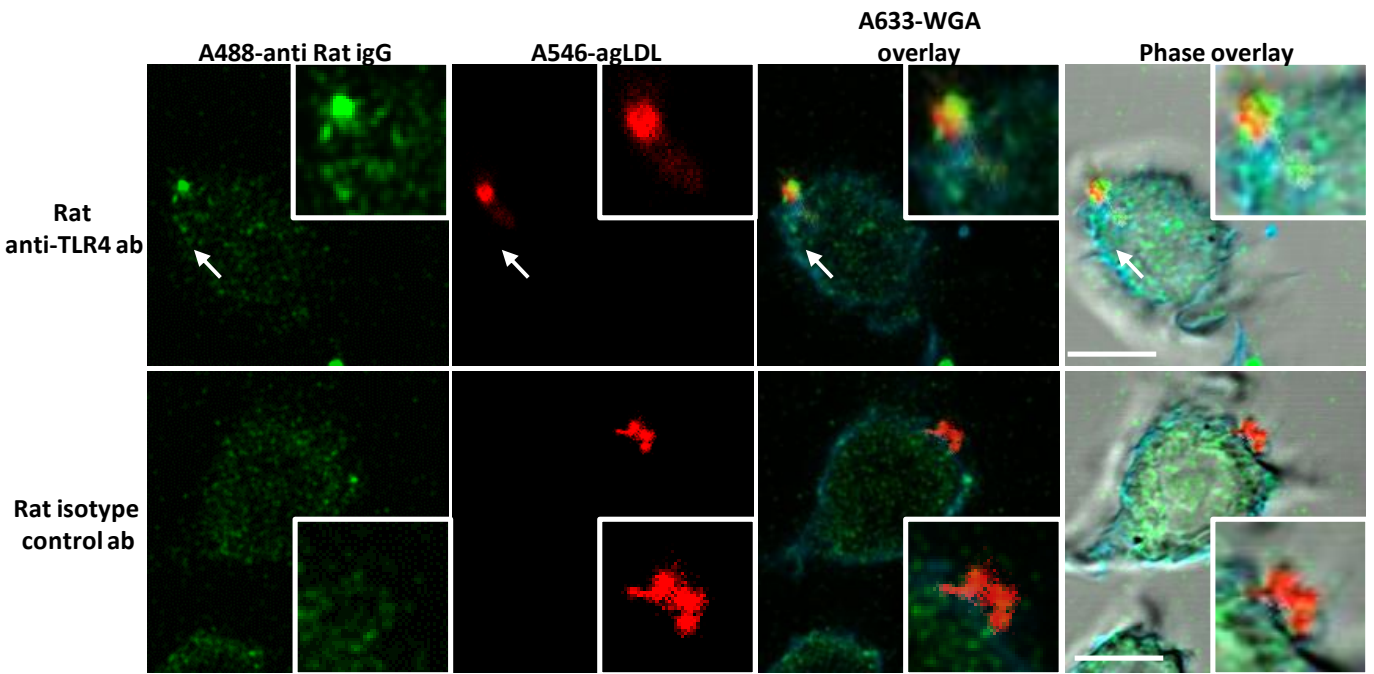

**Figure I. TLR4 clusters in the vicinity of the LS.** RAW264.7 macrophages were treated with A546-AgLDL for 1 hr and fixed using 3% PFA/0.5% glutaraldehyde. TLR4 was detected using a Rat anti-TLR4 antibody, followed by A488-anti Rat secondary antibody. Rat isotype control antibody was used to assess non-specific antibody binding. Cell plasma membrane was stained using A633-WGA. Arrow shows TLR4 clustering at the LS. Scale bars 20  $\mu$ m.

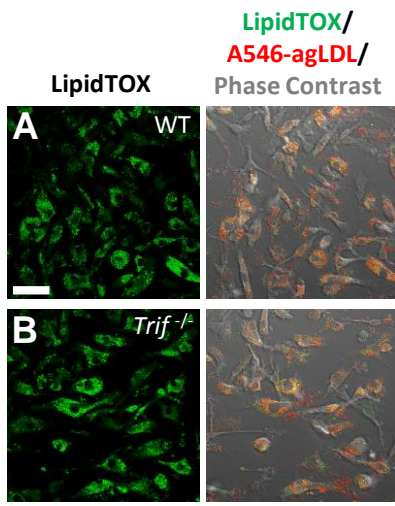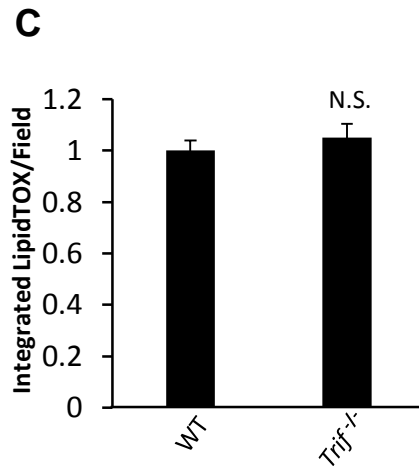

**Figure II. TRIF does not regulate foam cell formation in response to agLDL.** (A-B) Foam cell formation in response to agLDL was analyzed by confocal microscopy of (A) WT, (B) *Trif*<sup>-/-</sup> BMMs treated with A546-agLDL for 12 hr, fixed and neutral lipids stained using LipidTOX green. (C) Confocal images were used to quantify LipidTOX intensity per field. Data were compiled from 3 independent experiments per condition. Error bars represent the standard error of the mean (SEM). N.s. not statistically significant. Scale bar 40 μm.

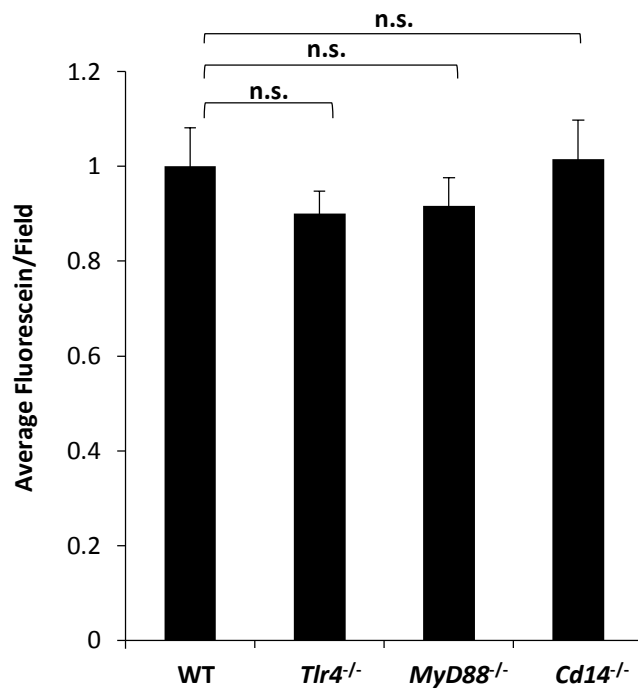

**Figure III. Biotin-fluorescein-dextran loading control.** No difference was seen in the pinocytosis of biotin-fluorescein-dextran between WT, *Tlr4*<sup>-/-</sup>, *Myd88*<sup>-/-</sup> and *Cd14*<sup>-/-</sup> macrophages. Data were compiled from at least 3 independent experiments per condition. Error bars represent the SEM. n.s. is non significant.

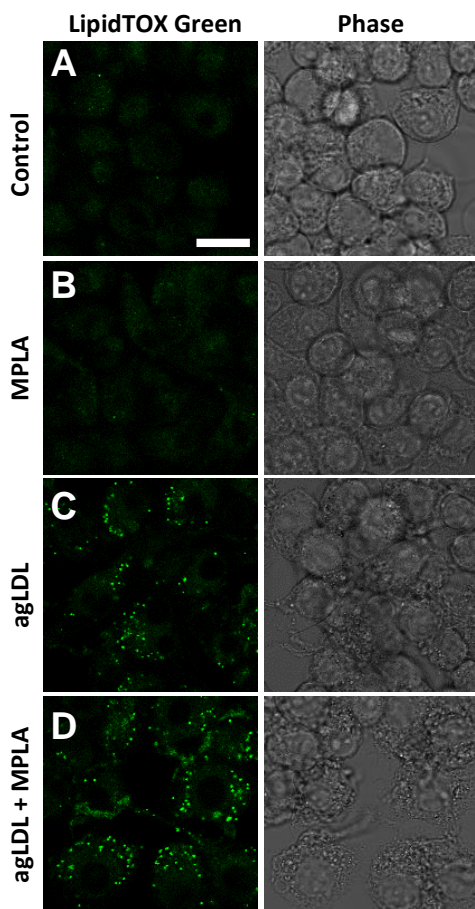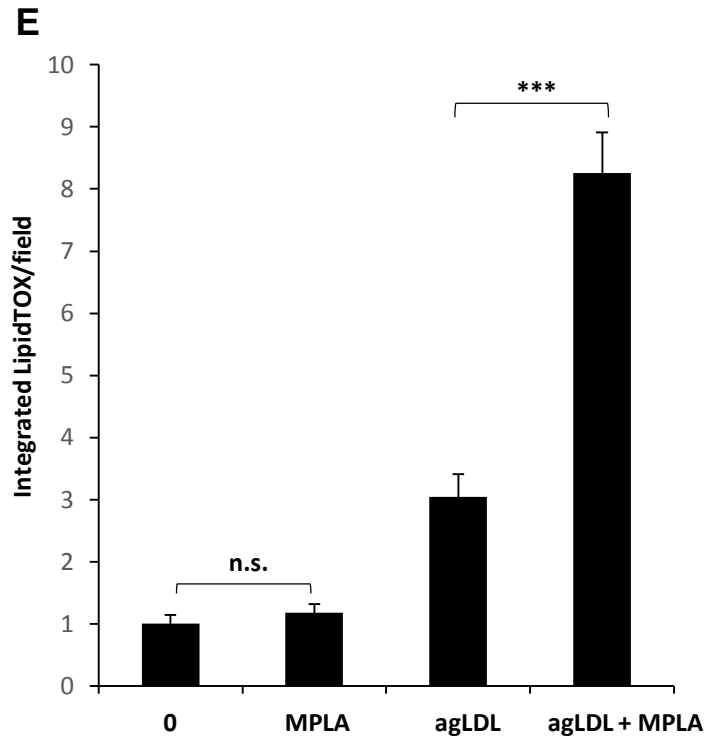

**Figure IV. TLR4 activation by MPLA enhances foam cell formation in response to agLDL treatment.** (A-D) J774 cells were left untreated (A, C) or pre-treated with MPLA for 1 hr (B, D) prior to agLDL treatment for 4 hrs (C-D). Cells were fixed using 3% PFA and neutral lipids stained using LipidTOX Green. Cells were analyzed by confocal microscopy. (E) Confocal images were used to quantify LipidTOX staining per field. Data were compiled from at least 3 independent experiments per condition. Error bars represent the SEM. \*\*\*  $p \leq 0.001$ . N.s. Not statistically significant. Scale bar 20  $\mu\text{m}$ .

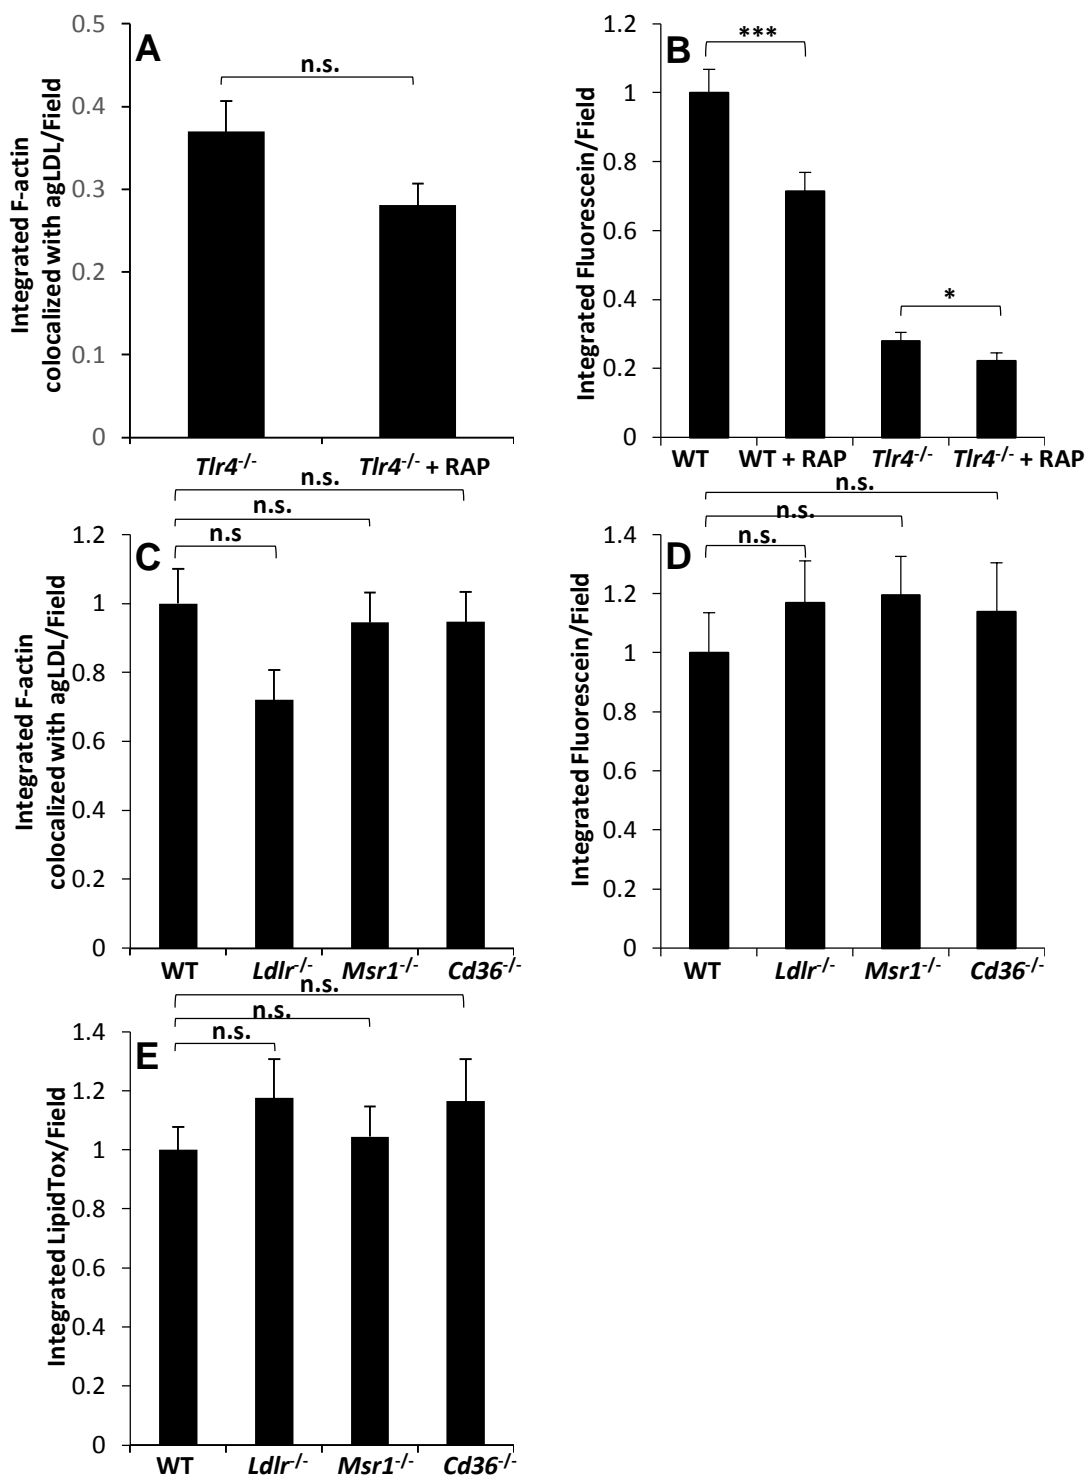

**Figure V. LRP can promote lysosome exocytosis but LDLr, MSR1 and CD36 are not involved in actin polymerization, lysosome exocytosis and foam cell formation in response to agLDL.** (A) *Tlr4*<sup>-/-</sup> BMMs were left untreated or pre-treated with RAP for 1 hr prior to incubation with A546-agLDL for 1 hr in the presence of RAP. Local F-actin rich structures used to form the compartment were quantified via confocal microscopy of A488-phalloidin stained samples and normalized to WT BMMs in the same experiments. (B) WT and *Tlr4*<sup>-/-</sup> BMMs with their lysosomes loaded with biotin-fluorescein-dextran were left untreated or pre-treated with RAP for 1 hr prior to incubation with streptavidin-A546-agLDL for 90 min in the presence of RAP. Exocytosis of biotin-fluorescein-dextran to aggregate containing compartments was quantified via confocal microscopy. (C) Quantification of the local F-actin rich structures used to form the lysosomal synapse in WT, *Ldlr*<sup>-/-</sup>, *Msr1*<sup>-/-</sup> and *Cd36*<sup>-/-</sup> BMMs. (D) Quantification of lysosome exocytosis to aggregate containing compartments in WT, *Ldlr*<sup>-/-</sup>, *Msr1*<sup>-/-</sup> and *Cd36*<sup>-/-</sup> BMMs. (E) Quantification of foam cell formation in WT, *Ldlr*<sup>-/-</sup>, *Msr1*<sup>-/-</sup> and *Cd36*<sup>-/-</sup> BMMs incubated with A546-agLDL for 12 hrs, fixed and stained with LipidTOX green. Data were compiled from at least 3 independent experiments per condition. Error bars represent the SEM. \*  $p \leq 0.05$ , \*\*\*  $p \leq 0.001$ . N.s. Not statistically significant.

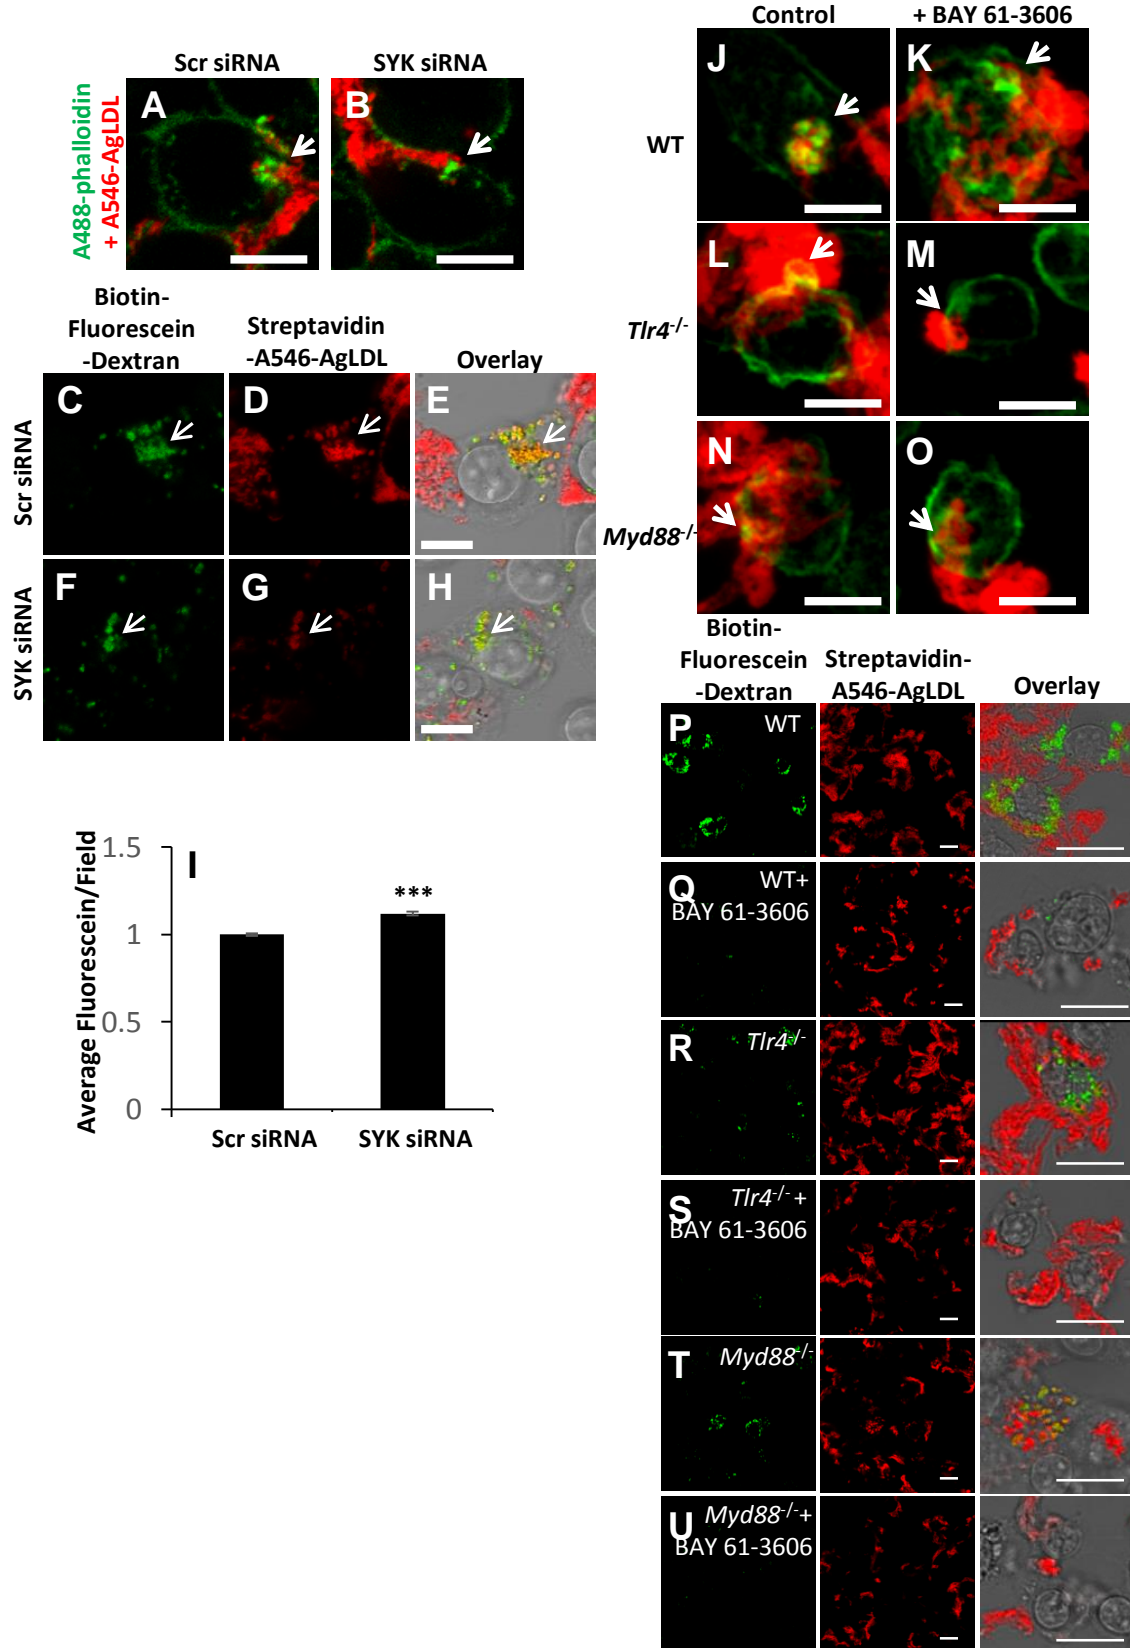

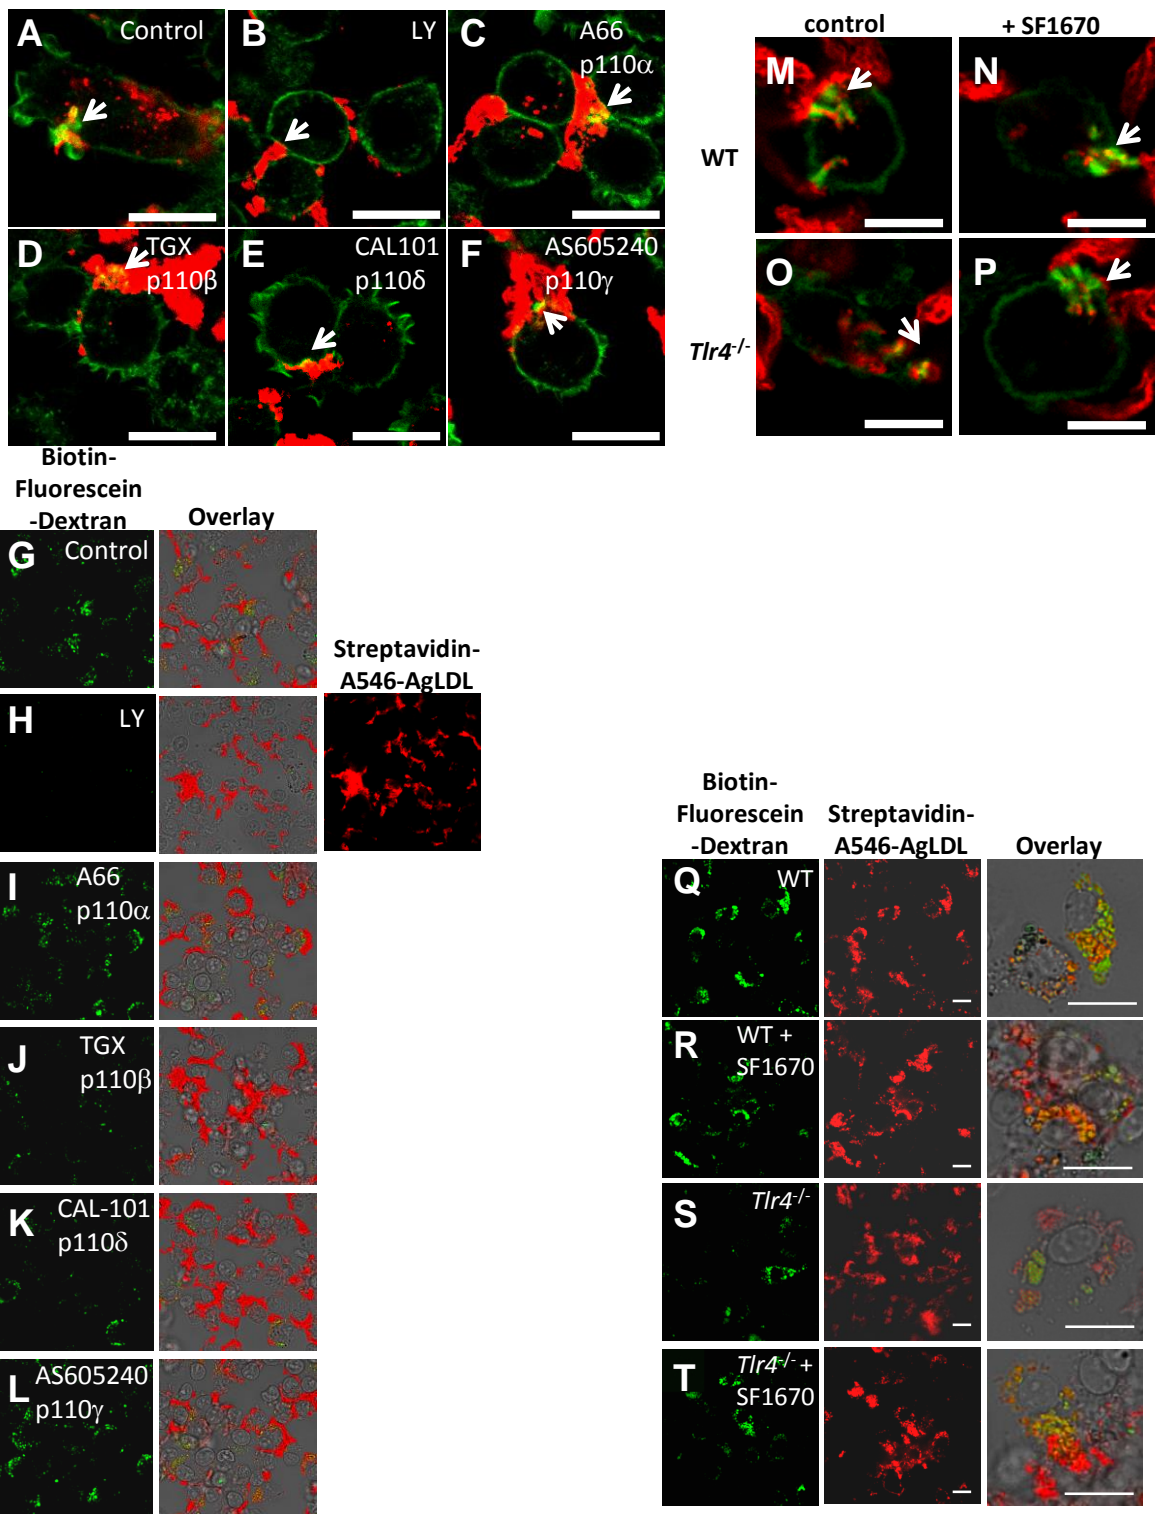



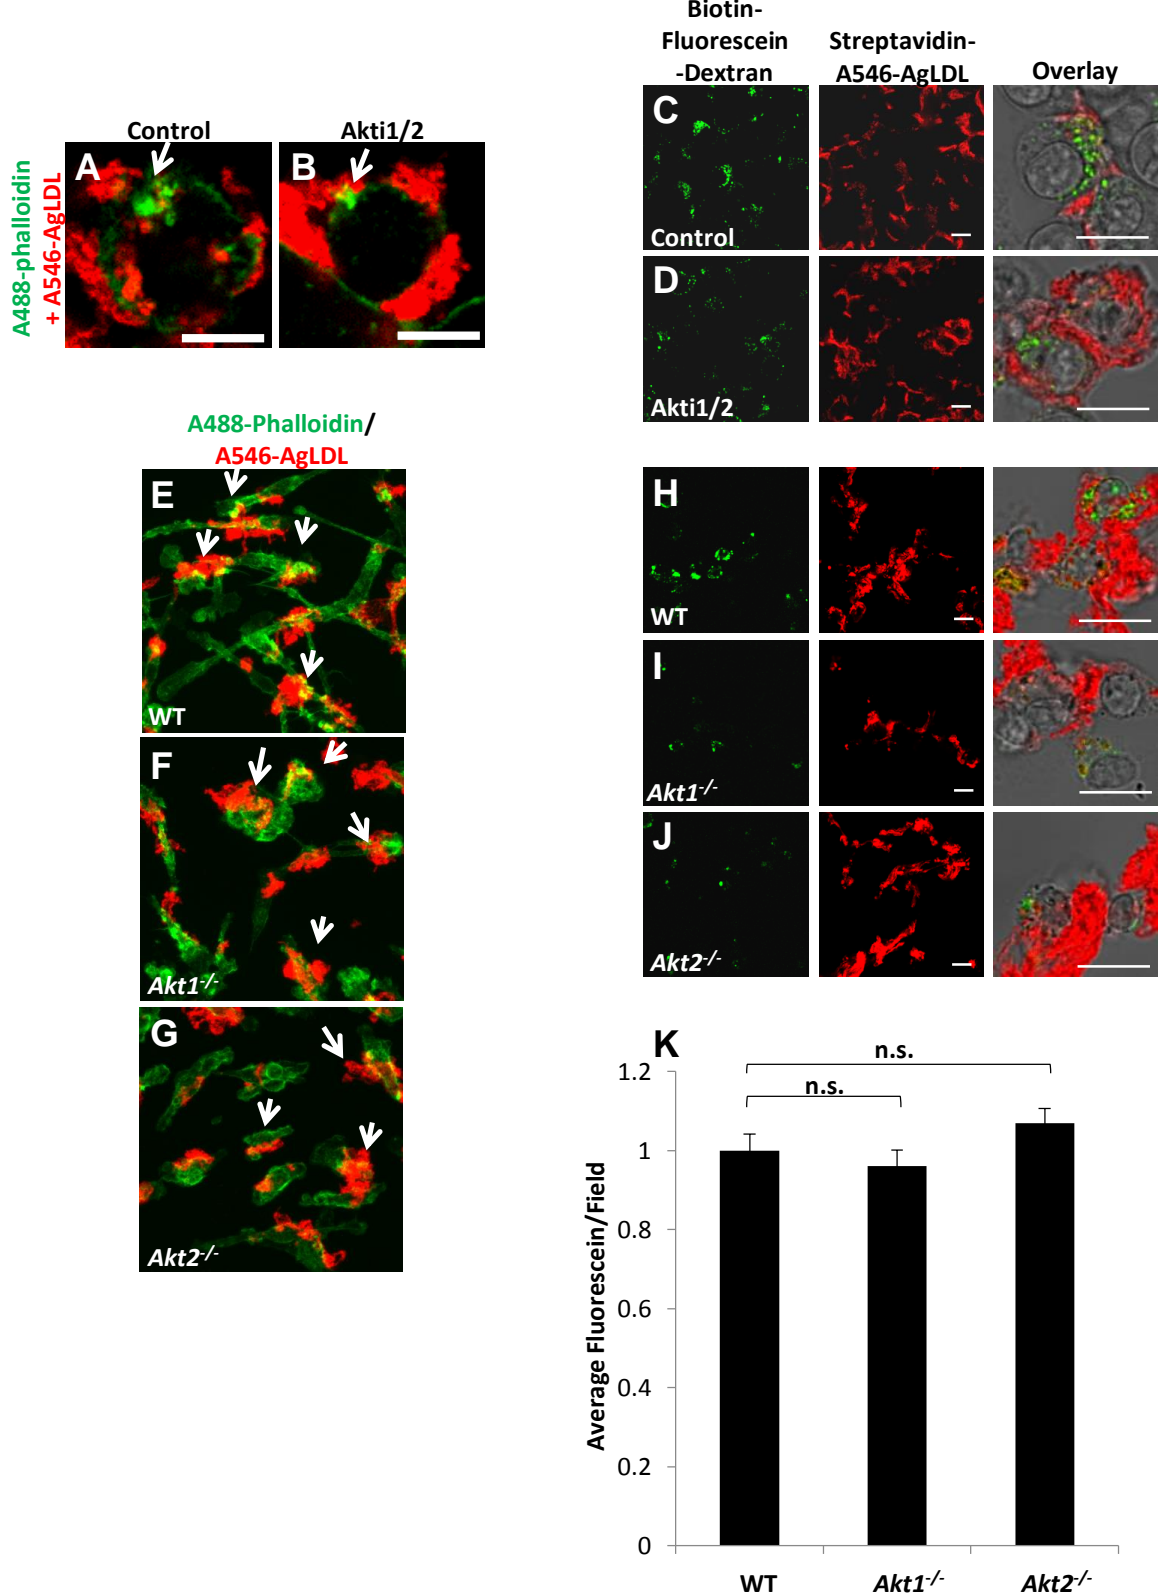

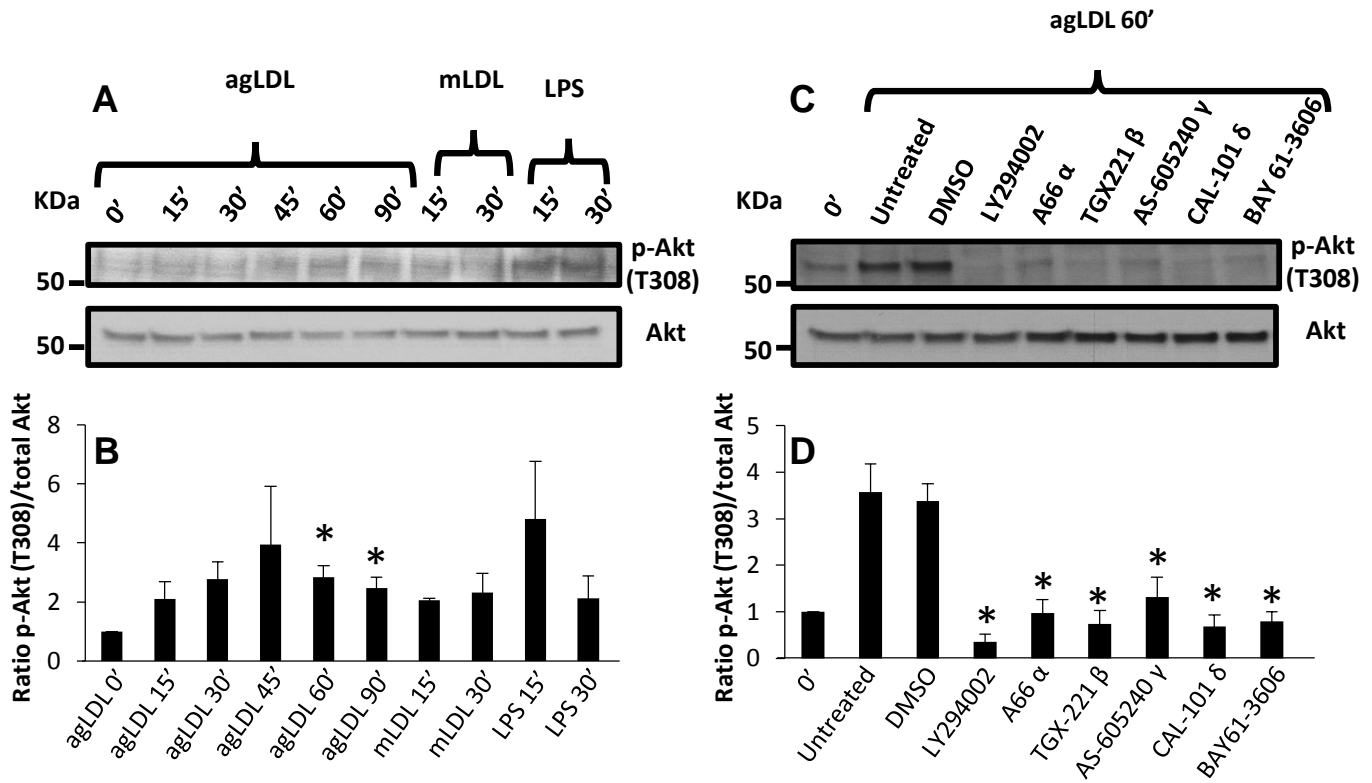

**Figure IX. AgLDL-stimulated Akt activation occurs in a PI3K/SYK dependent manner.** (A) J774 cells were treated with agLDL (1 mg/mL), mLDL (1 mg/mL) or LPS (100 ng/mL) for indicated periods of time. Ratios of phosphorylated to total protein were obtained by densitometry analysis for (B) Akt (T308). (C) J774 cells were pre-treated for 1 hr with various inhibitors (LY294002 50  $\mu$ M, A66 8  $\mu$ M, TGX-221 2  $\mu$ M, AS-605240 2  $\mu$ M, CAL-101 2  $\mu$ M, and BAY 61-3606 5  $\mu$ M), left untreated or treated with DMSO control, and subsequently incubated with agLDL (1 mg/mL) for 1 hr in the presence of inhibitors. Ratios of phosphorylated to total protein were obtained by densitometry analysis for (D) Akt (T308). Data were compiled from 3 independent experiments. Error bars represent the SEM. \*  $p < 0.05$ .

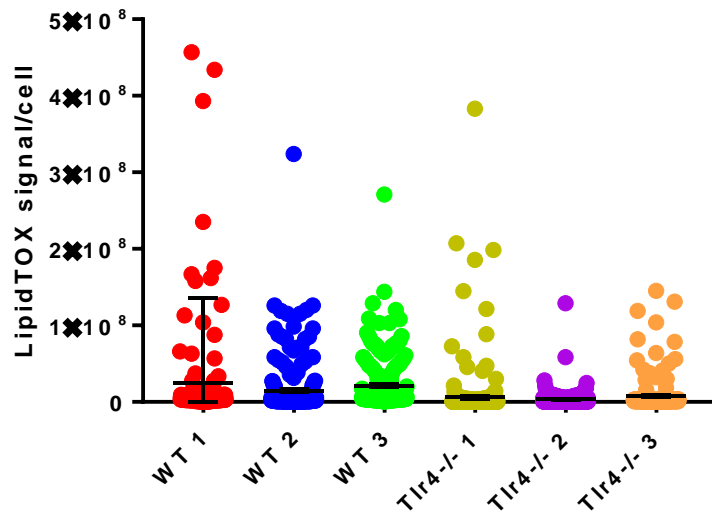

**Figure X. Macrophage deficiency of TLR4 protects against cholesterol uptake and foam cell formation *in vivo* during atherosclerosis.** *Ldlr*<sup>-/-</sup> mice were gamma irradiated and reconstituted with WT or *Tlr4*<sup>-/-</sup> marrows. Mice received a HFD for 16 weeks and were sacrificed. Aortas were digested, and single cell suspensions were centrifuged onto coverslips. Cells were stained to detect neutral lipid (LipidTOX green). Data are split per mouse and correspond to data shown in Figure 7L.

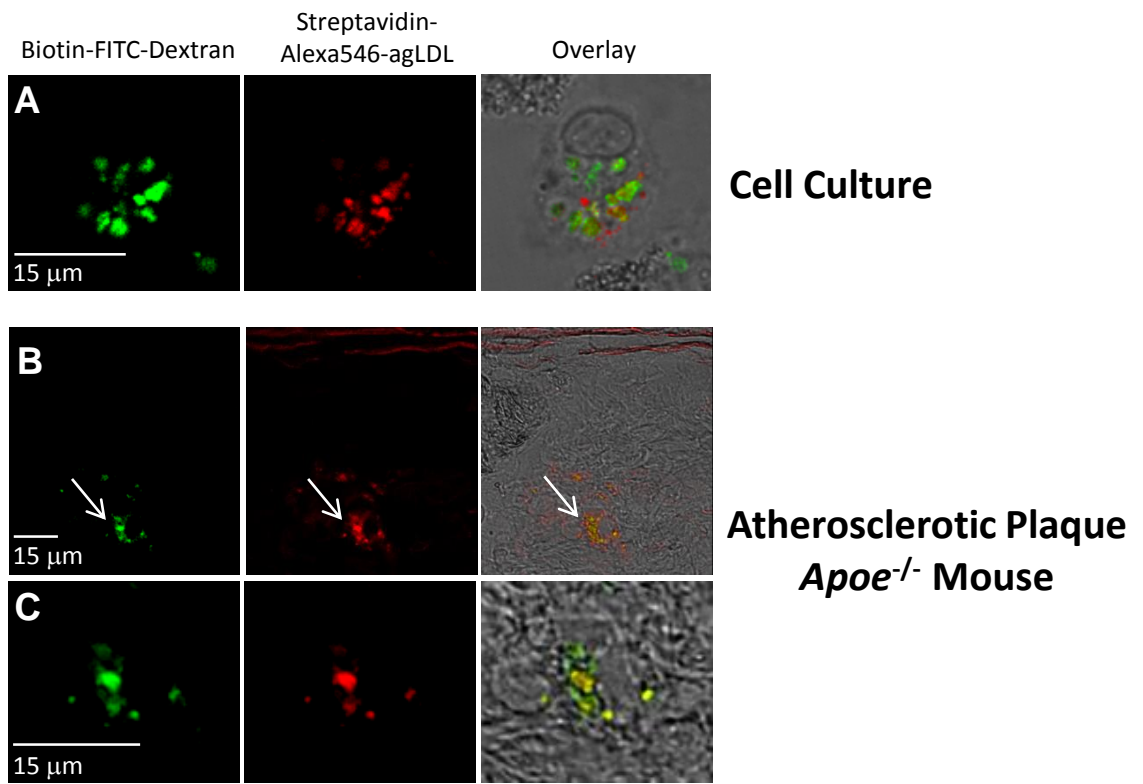

**Figure XI. Comparison of LS morphology in vitro and in vivo.** (A) J774 cells with their lysosomes loaded with biotin-fluorescein-dextran were incubated with streptavidin-A546-agLDL for 90 min, fixation and permeabilized. (B, C) *Apoe*<sup>-/-</sup> mice on a HFD were injected with streptavidin-A546-LDL 1 days prior to injection with BMMs with their lysosomes loaded with biotin-fluorescein-dextran. 3 days after adoptive transfer mice were sacrificed, and the aortas were harvested, sectioned and examined by confocal microscopy.

## Major Resources Tables

### Animals

| Species | Vendor or Source                                                     | Background Strain                                  | Sex |
|---------|----------------------------------------------------------------------|----------------------------------------------------|-----|
| Mouse   | The Jackson Laboratory                                               | C57BL/6J (stock #000664)                           | F   |
| Mouse   | The Jackson Laboratory                                               | Tlr4-/- (on C57BL/6J background) (stock #007227)   | F   |
| Mouse   | The Jackson Laboratory                                               | MyD88-/- (on C57BL/6J background) (stock #009088)  | F   |
| Mouse   | The Jackson Laboratory                                               | Cd14-/- (on C57BL/6J background) (stock #003726)   | F   |
| Mouse   | The Jackson Laboratory                                               | Trif-/- (on C57BL/6J background) (stock #005037)   | F   |
| Mouse   | The Jackson Laboratory                                               | Ldlr-/- (on C57BL/6J background) (stock #002207)   | F   |
| Mouse   | The Jackson Laboratory                                               | Cd36-/- (on C57BL/6J background) (stock #019006)   | F   |
| Mouse   | The Jackson Laboratory                                               | Scara1-/- (on C57BL/6J background) (stock #006096) | F   |
| Mouse   | The Jackson Laboratory                                               | ApoE-/- (on C57BL/6J background) (stock #002052)   | F   |
| Mouse   | Dr. Morris Birnbaum (University of Pennsylvania, School of Medicine) | Akt1-/- (on C57BL/6J background)                   | F   |
| Mouse   | Dr. Morris Birnbaum (University of Pennsylvania, School of Medicine) | Akt2-/- (on C57BL/6J background)                   | F   |

### Antibodies

| Target antigen     | Vendor or Source | Catalog # | Working concentration | Lot # (preferred but not required) |
|--------------------|------------------|-----------|-----------------------|------------------------------------|
| Phospho-Akt (T308) | Cell Signaling   | 2965      | 0.7 µg/mL             |                                    |
| Phospho-Akt (S473) | Cell Signaling   | 4060      | 0.09 µg/mL            |                                    |
| Akt (pan)          | Cell Signaling   | 4691      | 0.035 µg/mL           |                                    |
| SYK                | Cell Signaling   | 2712      | 0.073 µg/mL           |                                    |

|                              |                |        |            |  |
|------------------------------|----------------|--------|------------|--|
| GAPDH                        | Abcam          | Ab9485 | 0.4 µg/mL  |  |
| CD284(TLR4)/MD-2             | BD Biosciences | 562221 | 3.33 µg/mL |  |
| Rat IgD2a, κ isotype control | BD Biosciences | 555840 | 3.33 µg/mL |  |
| F4/80                        | Abcam          | Ab6640 | 3.33 µg/mL |  |

### Cultured Cells

| Name                  | Vendor or Source                          | Sex (F, M, or unknown) |
|-----------------------|-------------------------------------------|------------------------|
| J774A.1               | ATCC                                      | Female                 |
| RAW 264.7             | ATCC                                      | Male                   |
| J774A.1 shRNA control | Dr. Yuri Miller (University of San Diego) | Female                 |
| J774A.1 Tlr4 KD       | Dr. Yuri Miller (University of San Diego) | Female                 |
